1 **MECOM permits pancreatic acinar cell dedifferentiation avoiding cell death**  
2 **under stress conditions**

3

4 Running title: MECOM permits acinar cell dedifferentiation

5

6 Backx Elyne <sup>1</sup>, Wauters Elke <sup>2</sup>, Baldan Jonathan<sup>2</sup>, Van Bulck Mathias<sup>1</sup>, Michiels Ellis<sup>1</sup>,  
7 Heremans Yves<sup>1,3</sup>, De Paep Dieter Luc <sup>4</sup>, Bouwens Luc <sup>2</sup>, Kurokawa Mineo <sup>5</sup>, Goyama  
8 Susumu <sup>5</sup>, Jacquemin Patrick <sup>6</sup>, Houbracken Isabelle<sup>1,2</sup>, Rooman Ilse<sup>1</sup>

9

10 <sup>1</sup>Laboratory of Medical and Molecular Oncology, Oncology Research Centre, Vrije Universiteit Brussel,  
11 Brussels, Belgium

12 <sup>2</sup> Cell Differentiation Laboratory, Vrije Universiteit Brussel, Brussels, Belgium

13 <sup>3</sup>Laboratory of Beta Cell Neogenesis, Vrije Universiteit Brussel, Brussels, Belgium

14 <sup>4</sup> Beta Cell Bank, Diabetes Research Center, UZ Brussel, Brussels, Belgium

15 <sup>5</sup> Department of Hematology and Oncology, Graduate School of Medicine, The University of  
16 Tokyo, Tokyo, Japan

17 <sup>6</sup>Laboratory of Liver and Pancreatic Differentiation, De Duve Institute, Université Catholique de Louvain,  
18 Brussels, Belgium

19 Corresponding author: Ilse Rooman, [irooman@vub.be](mailto:irooman@vub.be)

20

21 **ABSTRACT**

22 Maintenance of the pancreatic acinar cell phenotype suppresses tumor formation.  
23 Hence, repetitive acute or chronic pancreatitis, stress conditions in which the acinar  
24 cells dedifferentiate, predispose for cancer formation in the pancreas. Dedifferentiated  
25 acinar cells acquire a large panel of duct cell specific markers. However, it remains  
26 unclear to what extent dedifferentiated acini differ from native duct cells and which  
27 genes are uniquely regulating acinar cell dedifferentiation. Moreover, most studies  
28 have been performed in mouse since the availability of human cells is scarce.  
29 Here, we applied a non-genetic lineage tracing method in our culture model of human  
30 pancreatic exocrine cells that allowed cell-type specific gene expression profiling by  
31 RNA sequencing. Subsequent to this discovery analysis, one transcription factor that  
32 was unique for dedifferentiated acinar cells was functionally characterized using *in vitro*  
33 and *in vivo* genetic loss-of-function experimental models.  
34 RNA sequencing analysis showed that human dedifferentiated acinar cells expressed  
35 genes in 'Pathways of cancer' with prominence of the transcription factor *MECOM*  
36 (*EVI-1*) that was absent from duct cells. During mouse embryonic development, pre-  
37 acinar cells transiently expressed *MECOM* and *MECOM* was re-expressed in  
38 experimental *in vivo* models of acute and chronic pancreatitis *in vivo*, conditions in  
39 which acinar cells dedifferentiate. *MECOM* expression correlated with and was directly  
40 regulated by *SOX9*. *MECOM* loss-of-function in mouse acinar cells *in vitro* and *in vivo*  
41 impaired cell adhesion resulting in more prominent acinar cell death and suppressed  
42 acinar cell dedifferentiation by limiting ERK signaling.  
43 In conclusion, we transcriptionally profiled the two major human pancreatic exocrine  
44 cell types, acinar and duct cells, during experimental stress conditions. We provide  
45 insights that in dedifferentiated acinar cells, cancer pathways are upregulated in which

46 MECOM is a critical regulator that suppresses acinar cell death by permitting cellular  
47 dedifferentiation.

48

## 49 **INTRODUCTION**

50 Few cancers have such poor survival rates as pancreatic ductal adenocarcinoma  
51 (PDAC) (1). Understanding the molecular mechanisms that are at play in early stage  
52 cancer formation is important to improve disease outcomes, but clinical samples of  
53 early disease are rare. Hence, genetically modified mouse models are pivotal to  
54 provide us insight into the contribution of the different pancreatic cell types to tumor  
55 formation (2-4). Accumulating evidence points to acinar cells as cells of origin for  
56 pancreatic tumor development (5-10). In order to become susceptible to  
57 tumorigenesis, acinar cells have to lose their differentiated phenotype to some extent.  
58 Consequently, tumorigenesis is restrained by mechanisms that control acinar cell  
59 differentiation (5-10). Loss of differentiation can result from repetitive acute or chronic  
60 pancreatitis whereby dedifferentiated acinar cells acquire a panel of markers that are  
61 typical for (embryonic) duct cells (11-13). Notably, duct cells can also give rise to  
62 tumors but likely through other mechanisms (14-16).

63 To date, knowledge is lacking to discriminate the mechanisms that govern the duct-  
64 like dedifferentiated acinar cell phenotype versus the 'native' duct cell phenotype, the  
65 latter being more resistant to stress- or inflammation-associated tumorigenesis.  
66 Previously, we had established *in vitro* experimental models that recapitulate a human  
67 (12) and rodent (13) acinar dedifferentiation. Specifically, upon suspension culture  
68 acinar cells lose their acinar-specific markers while gaining (embryonic) duct-like  
69 features, thereby mimicking chronic pancreatitis(12, 13). Here, we investigated the  
70 differential gene expression in adult human dedifferentiated acinar cells compared to

71 native duct cells from the same cell preparations. The transcription factor *MECOM/EVI-*  
72 *1* was found to be uniquely re-expressed in dedifferentiated acinar cells since  
73 embryonic development.

74 Although *MECOM* transcription factor is a known oncogene with a role in apoptosis  
75 (17-19) and pancreatic tumor formation (20, 21), its function in acinar cell  
76 (de)differentiation is still unknown. We analyzed its role in the context of acinar cell  
77 dedifferentiation through caerulein-induced pancreatitis modeling in transgenic *Evi-1*  
78 knock-out mice. We provide mechanistic insights that mouse acinar cells are  
79 dependent on *MECOM* expression to prevent cell death by allowing them acquisition  
80 of the dedifferentiated cell state.

81

## 82 **MATERIALS AND METHODS**

### 83 **Human donor material and cell culture**

84 Human pancreata from deceased donors were processed by the Beta Cell Bank of  
85 the Centre for Beta Cell Therapy in Diabetes (Brussels, Belgium), affiliated to the  
86 Eurotransplant Foundation (Leiden, The Netherlands). Consent for the use of  
87 residual donor material for research was obtained according to the legislation in  
88 country of organ procurement. This project was approved by the Medical Ethical  
89 Committee of UZ Brussel - Vrije Universiteit Brussel (B.U.N. 143201732260).  
90 Human exocrine cells were cultured as previously described (11, 12).

91

### 92 **Mouse strains and experiments**

93 *ElaCreERT* mice (22) *ElaCreERT;Sox9<sup>ff</sup>* (23) (kindly provided by P. Jacquemin (UCL,  
94 Belgium) originally from D. Stoffers (UPenn, USA)) were crossed with *EVI-1*exon4 loxP  
95 mice (*Mecom<sup>ff</sup>*) (24) (kindly provided by M. Kurokawa, UPenn), resulting in

96 ElaCreERT;*Mecom*<sup>ff</sup> mice (Mecom KO). ElaCreERT;*Sox9*<sup>ff</sup> (23) were kindly provided  
97 by P. Jacquemin (UCL, Belgium). Six to eight-weeks-old ElaCreERT;*Mecom*<sup>ff</sup> and  
98 ElaCreERT;*Sox9*<sup>ff</sup> mice received tamoxifen and (Z)-4-Hydroxytamoxifen (all from  
99 Sigma-Aldrich, St-Louis, MO, USA) and were treated with 1,25mg/kg body weight  
100 caerulein (Invitrogen Waltham, Massachusetts, USA) according to (23). Acinar cell  
101 isolation was adapted from (13). Embryonic mouse tissue was isolated from  
102 ElaCreERT mice at E16.5 timepoint of embryonic development. All animal experiments  
103 were approved by the Ethical Committee for Animal Testing at the Vrije Universiteit  
104 Brussel (#17-637-1).

105

#### 106 **Fluorescent activated cell sorting (FACS)**

107 FITC-conjugated UEA-1 (*Ulex Europaeus* Agglutinin-1, Sigma-Aldrich) lectin labeling  
108 of acinar cells within the human exocrine cell fraction was performed as in (12). At day  
109 4 of suspension culture, cell clusters were dissociated following the protocol of (11).  
110 Analysis and cell sorting were performed on a BD FACSAria (BD Biosciences, Franklin  
111 Lakes, NJ, USA). Viable, single cells were gated based on forward and side scatter.

112

113 More details on experimental design and statistics can be found in supplementary  
114 materials and methods.

115

#### 116 **Results**

##### 117 **MECOM is a cancer-related transcription factor uniquely expressed in human** 118 **dedifferentiated acinar cells**

119 Given the difference in propensity of dedifferentiated acinar cells and duct cells for  
120 pancreatitis-associated tumor development (5), we were specifically interested in the

121 differential gene expression of these two populations. Using the acinar-specific UEA-  
122 1 lectin in combination with the duct cell marker CA19.9, we FACS-purified both cell  
123 populations (11, 12) (Figure 1a,b). We confirmed the mutually exclusive expression  
124 pattern of CD142, a progenitor marker (11) in the UEA1+ dedifferentiated acinar cells,  
125 and of CA19.9 in the UEA1- duct cells (Figure 1b). We validated the different  
126 expression levels of the acinar cell markers MIST-1 and chymotrypsin, the progenitor  
127 marker CD142 and the duct-cell marker CK19 in the original mixed exocrine cell  
128 fraction and in the purified dedifferentiated acinar cells (UEA1+/CA19.9-) and native  
129 duct cells (UEA1-/CA19.9+) (Supplementary Figure 1). Comparing dedifferentiated  
130 acinar cells with native duct cells by RNAseq analysis highlighted 7953 differentially  
131 expressed genes (Adj.  $p < 0,01$ ). Of these, 1219 genes were expressed higher in  
132 dedifferentiated acinar cells (log fold change (FC) of  $\leq -2$ ; Adj.  $p < 0,01$ ) (Supplementary  
133 Table 1) and were enriched for the KEGG pathways (Adj.  $p < 0.01$ ): 'Protein digestion  
134 and absorption' and 'Pancreatic secretion', including genes such as carboxypeptidase  
135 A and amylase, pointing to gene expression reminiscent of the abundant acinar cell  
136 transcriptome (25). In addition, 'Pathways in cancer' belonged to the top enriched  
137 pathways such as those of the WNT signaling pathway, which is well-known for its  
138 function in pancreatic tumorigenesis. Other enriched pathways included 'PI3K-AKT  
139 signaling', which is involved in acinar cell dedifferentiation and pancreatic  
140 tumorigenesis (26-28) and 'Complement and coagulation cascades' encompassing  
141 genes belonging to the tissue damage pathway (Figure 1c) and that code for F8,  
142 fibrinogen and F3 (CD142), the marker used above (11) (Figure 1b).

143 Dedifferentiated acinar and duct cells did have equal expression of the embryonic  
144 precursor gene *PDX1*, confirming our previous work (13). *PTF1A*, *NR5A2*, *RBPJL*,  
145 *FOXA3* and *GATA4* were expressed higher in the dedifferentiated acini reminiscent of

146 their fully differentiated state. Of note, *GATA6* expression, which is required for  
147 embryonic acinar cell differentiation (29, 30) and a suppressor of pancreatic  
148 carcinogenesis (31, 32), was not different from the duct cells.

149 Conversely, duct cell-enriched genes included *CFTR*, *SOX9*, *NKX6.1*, *HES1*, *HNF1B*  
150 and *ONECUT2* (*HNF6B*), established markers of duct cell differentiation. The most  
151 significantly duct cell-enriched gene was *DCDC2* (Doublecortin Domain Containing 2),  
152 demonstrated to bind tubulin and enhance microtubule polymerization (33) (Figure 1d).  
153 In the duct cell fraction, we found KEGG pathway enrichment for 'ECM receptor  
154 pathway interaction' and 'O-linked glycosylation'. Also, here, 'Pathways in cancer'  
155 featured here but the genes in this pathway differed from the ones in the  
156 dedifferentiated acinar cell fraction (Supplementary Table 1).

157 Among the differentially expressed genes were 71 transcription factors. The most  
158 significantly enriched transcription factor in the dedifferentiated acinar cell fraction was  
159 *MECOM* (log2FC = -6,09; Adj. p = 1,04E-123) (Figure 1d, Supplementary Table 1).  
160 *MECOM*, a known oncogene (34-36). It has been described as an activator of KRAS  
161 and glypican-1 in pancreatic cancer (20, 21). During our study, it was reported in  
162 relation to acinar cell-derived tumorigenesis (37). Hence, we confirmed *MECOM*  
163 expression in human PDAC samples (N=3) (Supplementary Figure 2a). We also used  
164 RNAseq analysis of stage 1 and 2 PDAC (N=103) where it correlated positively with  
165 overall survival (Supplementary figure 2b). In the same cohort, we previously reported  
166 a similar pattern for *SOX9* and a correlation in expression between *SOX9* and *MECOM*  
167 (Pearson R=0,49) (23). Pathway analysis of genes correlating with *MECOM*  
168 (Supplementary figure 2c) revealed similar pathways as those reported in our study on  
169 *SOX9* where regulation of ErbB signaling was highlighted (23).

170 In conclusion, we FACS-purified human dedifferentiated acinar and duct cells and  
171 analyzed their transcriptome. The dedifferentiated acinar cell fraction showed a  
172 signature reminiscent of the acinar cell identity and specifically expressed *MECOM*, a  
173 transcription factor that featured in the pathway 'Pathways of cancer'. *MECOM* was  
174 expressed in PDAC where it correlated with *SOX9*. We hypothesized that *MECOM*  
175 plays a role during acinar cell dedifferentiation, an event that initiates pancreatic tumor  
176 development.

177

178 ***MECOM* is expressed in developing acinar cells and is re-expressed during**  
179 **pancreatitis-associated acinar cell dedifferentiation**

180 We comprehensively assessed expression of *MECOM* during acinar cell differentiation  
181 or loss thereof.

182 First, we confirmed the differential expression of *MECOM* in the purified human  
183 dedifferentiated acinar and duct cells from the experiments above (Figure 2a). Using  
184 RISH, *MECOM* mRNA appeared expressed at low levels in the acinar compartment of  
185 normal human pancreas ( $0,24 \pm 0,09$  mRNA dots/cell; N=3), but increased strongly in  
186 samples of chronic pancreatitis ( $1,46 \pm 0,10$  mRNA dots/cell; N=3) (Figure 2b,c).

187 Within the human purified dedifferentiated acinar cell fraction, *MECOM* showed strong  
188 correlation with *CD142* (Pearson R = 0,926, adj. P < 0,01), as discussed before (Figure  
189 1). Immunofluorescent co-staining of *MECOM* and *CD142* after 4 days of culture  
190 showed strong colocalization of the two proteins ( $56,94 \pm 10,63\%$  *MECOM*+/*CD142*+  
191 cells; N=5), while *MECOM* did not co-localize with the duct cell marker *CK19*  
192 ( $5,69 \pm 2,32\%$  *MECOM*+/*CK19*+ cells; N=5) (Figure 2d,e).

193 Next, we assessed the expression pattern (Figure 2f-i) and levels (Figure 2j) of *Mecom*  
194 mRNA in murine pancreas. In contrast to normal adult mouse pancreas where *Mecom*



195 was expressed at very low levels (Figure 2f,j) a significantly increased expressed was  
196 noted in E16.5 pancreas where it localized to pro-acinar tip cells (Figure 2g,j) (38, 39).  
197 Similar to human, *Mecom* became re-expressed during acute and chronic pancreatitis  
198 in mouse (Figure 2h,i,j).

199 Altogether, these data show that *Mecom* is transiently expressed in developing acinar  
200 cells and becomes re-expressed during pancreatitis in dedifferentiated acinar cells.

201

### 202 **SOX9 regulates *Mecom* expression in dedifferentiated acinar cells**

203 SOX9 is an important marker of acinar cell dedifferentiation and is indispensable for  
204 tumor formation in the pancreas (23). SOX9 correlates with MECOM in PDAC patients,  
205 as shown above, but also in other tissues (40, 41). Hence, we investigated whether  
206 these two transcription factors might also correlate in the context of acinar cell  
207 dedifferentiation. Indeed, we observed a strong correlation between *MECOM* and  
208 *SOX9* (Pearson R = 0,83; \*p=0,015; N=6) (Figure 3a) in the human exocrine cell  
209 cultures in which acinar cells gradually dedifferentiate, a finding which was confirmed  
210 at the protein level (Figure 3b).

211 Based on the observed induction of *Mecom* after 48 hours of caerulein-induced acute  
212 pancreatitis (Figure 2h), we investigated *Mecom* expression in *Sox9* loss-of-function  
213 mice (Figure 3c) (13, 42). *ElaCreERT;Sox9<sup>ff</sup>* mice showed significant reduction in  
214 *Mecom* compared to control mice (*ElaCreERT*) ( $19,48 \pm 4,54\%$  reduction in mRNA  
215 dots) (Figure 3c). suggestive for SOX9 to act as an upstream regulator of *Mecom*.

216 To further study whether SOX9 directly regulated *Mecom* in the acinar cell context, we  
217 performed a promoter-reporter assay on the partially differentiated mouse acinar cell  
218 line 266-6 (that expresses *Mecom*, as shown further). We observed low increase in  
219 luciferase activity when cells were transfected with the *Mecom* enhancer expression

220 plasmid alone. After Sox9 overexpression, luciferase activity increased significantly  
221 (Figure 3d), indicating that SOX9 regulates the Mecom enhancer in partially  
222 differentiated acinar cells.

223 In conclusion, we showed that *Mecom* is (directly) regulated by SOX9 in pancreatic  
224 acinar cell context.

225

### 226 ***Mecom* maintains cell adhesion and cell viability in a partially differentiated** 227 **acinar cell line and in human and mouse acinar cell cultures**

228 A lentiviral all-in-one CRISPR/Cas9-mediated approach comparing 3 different gRNAs  
229 designed to knock out (KO) *Mecom* in a partially differentiated acinar cell line (266-6)  
230 (Supplementary Figure 3), enabled us to study the role of Mecom in acinar cell  
231 dedifferentiation. RISH for *Mecom* in the loss-of-function condition (Figure 4a) showed  
232 significant reduction of mRNA expression ( $27,30 \pm 4,25\%$  dots/cell decrease). In the  
233 *Mecom* KO condition, the cells were not able to organize into the typical 'acinar dome-  
234 like' structures that were observed in the cells transduced with non-targeting gRNA  
235 (Figure 4b), suggestive of loss of proper cell-cell contacts. We also observed a  
236 decrease in absolute cell number (Figure 4c), an overall diminished cell viability (Figure  
237 4d) and a significant increase in cleaved caspase 3+ cells (Figure 4e), all indicative of  
238 cell death.

239 We further studied downstream transcriptional effects of *Mecom* loss in this cell line by  
240 RNAseq analysis. Differential gene expression analysis revealed downregulation of  
241 genes enriched in 'Focal adhesion', 'ECM receptor interaction' and 'Pathways in  
242 cancer' (Figure 4f). This supported our observations of diminished dome formation due  
243 to potentially impaired cell adhesion. We also compared the differentially expressed  
244 genes from the *Mecom* KO condition with a publicly available MECOM ChIP-Seq

245 dataset (43) and found several overlapping genes (Figure 4g) that we further  
246 considered, in particular integrins that link the extracellular matrix (ECM) components  
247 such as collagen to the cytoskeleton. The data suggested that loss of *Mecom* might  
248 compromise cell-cell interaction by diminished Collagen IV-Integrin  $\alpha 2$  interaction and  
249 downstream ERK-mediated signaling (Figure 4h), the latter considered crucial in acinar  
250 cell dedifferentiation (44).

251 Diminished expression of collagen type IV and reduced ERK signaling upon *Mecom*  
252 loss-of-function was confirmed by immunofluorescent staining (Figure 4i,j).

253 In conclusion, *Mecom* is indispensable to maintain cell adhesion and cell viability in a  
254 partially differentiated acinar cell line.

255 Next, we crossed *ElaCreERT* deleter mice with mice carrying a floxed exon 4 of *Evi*,  
256 an exon which is conserved in all transcript variants (24) (Figure 5a). We studied  
257 effects in dedifferentiated acinar cells isolated from these mice using an established  
258 cell culture model, similar to the human cell culture model described above (13).  
259 Immunohistochemical staining for MECOM showed  $42,71 \pm 13,42\%$  less MECOM  
260 positive cells in freshly isolated (day 0) MECOM KO exocrine cells, consistent with  
261 previous reports on the recombination efficiency of the *ElaCreERT* strain (45-47).  
262 Interestingly, by day 4, we detected only  $23,89 \pm 13,42\%$  less MECOM positive cells in  
263 the KO condition suggesting selective loss of MECOM deficient cells (Supplementary  
264 Figure 4).

265 We observed that after cell isolation the control cells remained organized in small  
266 acinar spheroid-like structures while in the MECOM KO condition they often presented  
267 as single cells. After 4 days of culture, clusters did form in the *ElaCreERT;Mecom<sup>ff</sup>*  
268 mouse cells but cluster diameter was significantly smaller compared to those of  
269 *ElaCreERT* control mice ( $57,21 \pm 15,73\%$  reduction in average diameter) (Figure 5b,e),

270 suggestive of diminished cell adhesion and cell death of the single cells. In our  
271 experience acinar cells cannot survive as single cells (e.g. after FACS purification).  
272 Similar to our results in the 266-6 cells (Figure 4), an increased fraction of acinar cells  
273 in the MECOM KO cultures stained positive for cleaved caspase 3 ( $81,21 \pm 26,47\%$   
274 increase in cleaved caspase 3+ cells) (Figure 5c,f). Notably, the MECOM KO cultures  
275 also showed fewer expression of CK19+ cells in comparison to the control cells  
276 ( $25,79 \pm 6,33\%$  reduction in CK19+ cells), suggesting a lower capacity for  
277 dedifferentiation (Figure 5d,g).  
278 These observations were confirmed by shRNA-mediated knockdown in cultured  
279 human exocrine cells in culture. At 24h, 4 and 7 days after transduction, average  
280 cluster diameter was significantly decreased (Supplementary Figure 5), underscoring  
281 the compromised cell-cell adhesion.  
282 In conclusion, MECOM is indispensable for maintenance of cell-cell adhesion and cell  
283 viability in primary cultures of mouse and human acinar cells.

284

### 285 **Mice with *Mecom*-deficient acinar cells show impaired recovery from acute** 286 **pancreatitis**

287 Since the primary cell culture models above recapitulate acinar cell dedifferentiation  
288 as it occurs during pancreatitis (11-13), we subjected control and MECOM KO mice to  
289 caerulein-induced acute pancreatitis. In wild-type mice, acute pancreatitis peaks  
290 around day 4 and resolves by day 11 (Figure 6a). We observed no macroscopic  
291 differences in the pancreas nor in weight of the pancreas or body weight when  
292 comparing *Mecom*-deficient with control mice (Supplementary Figure 6).  
293 Haematoxylin-eosin staining however showed more inter-acinar spaces at day 11 in  
294 the *Mecom* KO mice (Figure 6b,f). Similar to the phenotype observed in the 266-6 cells

295 (Figure 4) and the *ex vivo* cultures (Figure 5), this was preceded by an increased  
296 incidence of apoptosis (Figure 6c,g). Since we observed more inter-acinar space in the  
297 Mecom KO mice, we analyzed immune cell infiltration. Similar to a previous report (37),  
298 at day 11, CD3 positive area in MECOM KO mice remained at a level comparable to  
299 the acute phase of pancreatitis (day 4) whereas in the control mice it was significantly  
300 decreased (Figure 6e,i). F4/80+ macrophages showed a similar trend (not shown).  
301 Remarkably, no difference in collagen deposition could be detected between control  
302 and MECOM KO mice (Figure 6d,h) indicating that the inter-acinar space was not filled  
303 with collagen. The histological pattern showing accumulation of excessive liquid in the  
304 interstitial space was consistent with that of edema. Also, we did not observe any  
305 changes in acinar-to-ductal transdifferentiation markers at day 11 (not shown).  
306 Altogether, these results indicate that MECOM-deficiency in pancreatic acinar cells  
307 under the experimental stress of acute pancreatitis leads to increased acinar cell death  
308 with ensuing immune cell infiltration and edema.

309

## 310 **Discussion**

311 When subjected to stress, such as occurring during chronic pancreatitis, acinar cells  
312 dedifferentiate and acquire a ductal cell-like phenotype, rendering them prone to *Kras*  
313 induced transformation, in contrast to the native duct cells which seem more resistant  
314 to neoplastic development. Where studies in the past focused on the acinar cell  
315 plasticity and on how the dedifferentiated acinar cells become duct-like (13), the  
316 inherent differences between the two cell populations that may underly a different  
317 propensity to tumor formation remained unclear. Therefore, we profiled, for the first  
318 time to our knowledge, the transcriptome of human dedifferentiated acinar cells versus  
319 their native duct cell counterpart. This comparative transcriptomic analysis provided

320 several new insights, including the fact that both cell populations were enriched in  
321 'Pathways of cancer' although the related genes differed in both fractions. We identified  
322 MECOM, a transcription factor known to be involved in (pancreatic) cancer, as the  
323 most uniquely expressed gene in the dedifferentiated acinar cells.

324 MECOM is known to regulate many aspects of tumorigenesis including differentiation,  
325 proliferation and apoptosis (17-19, 40). It is a regulator of stomach-specific genes,  
326 some of which become upregulated in dedifferentiated acinar cells (23). Previously, a  
327 role for MECOM in pancreas cancer was proposed (20, 21, 37). Here, we focused on  
328 its role in acinar cell dedifferentiation. We uncovered that MECOM is uniquely  
329 expressed in dedifferentiated mouse and human acinar cells and absent from native  
330 duct cells, both in cell cultures and in tissue samples. Notably, MECOM expression  
331 levels appeared even higher in embryonic mouse pancreas, specifically in the pro-  
332 acinar tip cells again suggesting a relation to an immature acinar cell phenotype.

333 Interestingly, SOX9 is a known regulator of acinar cell dedifferentiation and a driver of  
334 pancreatic tumor formation (21, 48). Here, SOX9 expression correlated with that of  
335 MECOM. An interplay of MECOM and SOX9 has been described in other tissues (12,  
336 13, 44) and we confirmed that SOX9 transactivates the *Mecom* enhancer in an acinar  
337 cell context. Still, it requires further investigation why SOX9 does not transactivate  
338 MECOM expression in duct cells where SOX9 expression is the highest.

339 We observed a clear phenotype when culturing MECOM deficient acinar cells (266-6  
340 cells and primary mouse and human acinar cells), i.e. impaired formation of acinar  
341 domes or cell clusters, suggesting impaired cell adhesion and higher rates of  
342 apoptosis. We showed that MECOM depletion reduced the cell-cell interactions  
343 through *Itga2* and its ligands such as *Col4a2*. In our MECOM KO cells, the expression  
344 of several integrins (*Itga2*, *Itga4*, *Itga5* and *Itga9*) was decreased. Importantly,

345 available CHIP-Seq data of MECOM in human ovarian carcinoma cells also showed  
346 direct binding to the promotor regions of *Col4a2* and *Itga2* (43). We confirmed this in  
347 MECOM KO cells, where reduced activity of the ERK signaling pathway could be  
348 directly linked to reduced acinar cell dedifferentiation, a process for which this signaling  
349 pathway is critical (12, 44). In a caerulein-induced acute pancreatitis model in MECOM-  
350 deficient mice, we again make similar observations and demonstrated a prolonged  
351 immune cell infiltration, similar as reported recently (37).

352 We propose that normal acinar cells have two options when they are subjected to  
353 stress, either to subside in an “incognito” reversible dedifferentiated state, or to die.  
354 MECOM seems indispensable for the former option. Ye et al., who, like us did not  
355 provide formal proof by lineage tracing, claimed that MECOM-deficient acinar cells  
356 transdifferentiate more extensively during pancreatitis (37). We suggest that MECOM-  
357 deficient acinar cells undergo apoptosis and therefore cannot contribute any longer to  
358 the CK19+ transdifferentiated cell pool. This is supported by our observations  
359 increased inter-acinar spaces filled with fluid (edema) in the acute pancreatitis model.  
360 Such phenotype has also been reported in EGF knockout mice (49). We also did not  
361 detect any increase in collagen deposition around the recovering acini, which clearly  
362 differs from acinar to ductal transdifferentiation that is accompanied by typical collagen  
363 deposition (50), further supporting our conclusion.

364 Altogether, these results show that dedifferentiated acinar cells have a clearly distinct  
365 gene expression profile compared to native duct cells. Under stress, MECOM  
366 expression is turned on, downstream of SOX9, where it prevents acinar cell death and  
367 allowing cellular dedifferentiation.

368

369

370 **Acknowledgements**

371 Biospecimens and clinical data were provided by the Australian Pancreatic Cancer  
372 Genome Initiative (APGI, [www.pancreaticcancer.net.au](http://www.pancreaticcancer.net.au)), which is supported by an  
373 Avner Pancreatic Cancer Foundation Grant ([www.avnersfoundation.org.au](http://www.avnersfoundation.org.au)).

374 This work was supported by the Research Foundation Flanders (FWO) (Odysseus  
375 project and FWO research project to IR (FWOODYS12 and FWOAL931)). We thank  
376 Gunter Leuckx, Emmy De Blay, Veerle Laurysens, Geert Stangé, the laboratory of  
377 Liver Cell Biology Research Group at Vrije Universiteit Brussel and Flemish Institute  
378 of Biotechnology for expert technical assistance. We thank Patrick Jacquemin for  
379 providing the ElaCreERT mice, and Susumu Goyama and Mineo Kurokawa for  
380 providing the Evi-1 floxed mice.

381

382 **Conflict of interest**

383 The authors declare no competing financial interests

384

385

386 **References**

- 387 1. Rahib L, Smith BD, Aizenberg R, Rosenzweig AB, Fleshman JM, Matrisian LM.  
388 Projecting cancer incidence and deaths to 2030: the unexpected burden of thyroid,  
389 liver, and pancreas cancers in the United States. *Cancer Res.* 2014;74(11):2913-21.
- 390 2. Krah NM, De La OJ, Swift GH, Hoang CQ, Willet SG, Chen Pan F, et al. The  
391 acinar differentiation determinant PTF1A inhibits initiation of pancreatic ductal  
392 adenocarcinoma. *Elife.* 2015;4.
- 393 3. Dizenzo D, Hess DA, Damsz B, Hallett JE, Marshall B, Goswami C, et al.  
394 Induced Mist1 expression promotes remodeling of mouse pancreatic acinar cells.  
395 *Gastroenterology.* 2012;143(2):469-80.



- 396 4. von Figura G, Morris JPt, Wright CV, Hebrok M. Nr5a2 maintains acinar cell  
397 differentiation and constrains oncogenic Kras-mediated pancreatic neoplastic  
398 initiation. *Gut*. 2014;63(4):656-64.
- 399 5. Kopp JL, von Figura G, Mayes E, Liu FF, Dubois CL, Morris JPt, et al.  
400 Identification of Sox9-dependent acinar-to-ductal reprogramming as the principal  
401 mechanism for initiation of pancreatic ductal adenocarcinoma. *Cancer Cell*.  
402 2012;22(6):737-50.
- 403 6. De La OJ, Emerson LL, Goodman JL, Froebe SC, Illum BE, Curtis AB, et al.  
404 Notch and Kras reprogram pancreatic acinar cells to ductal intraepithelial neoplasia.  
405 *Proc Natl Acad Sci U S A*. 2008;105(48):18907-12.
- 406 7. Habbe N, Shi G, Meguid RA, Fendrich V, Esni F, Chen H, et al. Spontaneous  
407 induction of murine pancreatic intraepithelial neoplasia (mPanIN) by acinar cell  
408 targeting of oncogenic Kras in adult mice. *Proc Natl Acad Sci U S A*.  
409 2008;105(48):18913-8.
- 410 8. Tuveson DA, Zhu L, Gopinathan A, Willis NA, Kachatrian L, Grochow R, et al.  
411 Mist1-KrasG12D knock-in mice develop mixed differentiation metastatic exocrine  
412 pancreatic carcinoma and hepatocellular carcinoma. *Cancer Res*. 2006;66(1):242-7.
- 413 9. Grippo PJ, Nowlin PS, Demeure MJ, Longnecker DS, Sandgren EP.  
414 Preinvasive pancreatic neoplasia of ductal phenotype induced by acinar cell targeting  
415 of mutant Kras in transgenic mice. *Cancer Res*. 2003;63(9):2016-9.
- 416 10. Guerra C, Schuhmacher AJ, Canamero M, Grippo PJ, Verdaguer L, Perez-  
417 Gallego L, et al. Chronic pancreatitis is essential for induction of pancreatic ductal  
418 adenocarcinoma by K-Ras oncogenes in adult mice. *Cancer Cell*. 2007;11(3):291-302.

- 419 11. Baldan J, Houbracken I, Rooman I, Bouwens L. Adult human pancreatic acinar  
420 cells dedifferentiate into an embryonic progenitor-like state in 3D suspension culture.  
421 Sci Rep. 2019;9(1):4040.
- 422 12. Houbracken I, de Waele E, Lardon J, Ling Z, Heimberg H, Rooman I, et al.  
423 Lineage tracing evidence for transdifferentiation of acinar to duct cells and plasticity of  
424 human pancreas. Gastroenterology. 2011;141(2):731-41, 41 e1-4.
- 425 13. Pinho AV, Rooman I, Reichert M, De Medts N, Bouwens L, Rustgi AK, et al.  
426 Adult pancreatic acinar cells dedifferentiate to an embryonic progenitor phenotype with  
427 concomitant activation of a senescence programme that is present in chronic  
428 pancreatitis. Gut. 2011;60(7):958-66.
- 429 14. Roy N, Malik S, Villanueva KE, Urano A, Lu X, Von Figura G, et al. Brg1  
430 promotes both tumor-suppressive and oncogenic activities at distinct stages of  
431 pancreatic cancer formation. Genes Dev. 2015;29(6):658-71.
- 432 15. Lee AYL, Dubois CL, Sarai K, Zarei S, Schaeffer DF, Sander M, et al. Cell of  
433 origin affects tumor development and phenotype in pancreatic ductal adenocarcinoma.  
434 Gut. 2018.
- 435 16. Pinho AV, Chantrell L, Rooman I. Chronic pancreatitis: a path to pancreatic  
436 cancer. Cancer Lett. 2014;345(2):203-9.
- 437 17. Konantz M, Andre MC, Ebinger M, Grauer M, Wang H, Grzywna S, et al. EVI-1  
438 modulates leukemogenic potential and apoptosis sensitivity in human acute  
439 lymphoblastic leukemia. Leukemia. 2013;27(1):56-65.
- 440 18. Rommer A, Steinmetz B, Herbst F, Hackl H, Heffeter P, Heilos D, et al. EVI1  
441 inhibits apoptosis induced by antileukemic drugs via upregulation of  
442 CDKN1A/p21/WAF in human myeloid cells. PLoS One. 2013;8(2):e56308.

- 443 19. Glass C, Wuertzer C, Cui X, Bi Y, Davuluri R, Xiao YY, et al. Global Identification  
444 of EVI1 Target Genes in Acute Myeloid Leukemia. *PLoS One*. 2013;8(6):e67134.
- 445 20. Tanaka M, Ishikawa S, Ushiku T, Morikawa T, Isagawa T, Yamagishi M, et al.  
446 EVI1 modulates oncogenic role of GPC1 in pancreatic carcinogenesis. *Oncotarget*.  
447 2017;8(59):99552-66.
- 448 21. Tanaka M, Suzuki HI, Shibahara J, Kunita A, Isagawa T, Yoshimi A, et al. EVI1  
449 oncogene promotes KRAS pathway through suppression of microRNA-96 in  
450 pancreatic carcinogenesis. *Oncogene*. 2014;33(19):2454-63.
- 451 22. Desai BM, Oliver-Krasinski J, De Leon DD, Farzad C, Hong N, Leach SD, et al.  
452 Preexisting pancreatic acinar cells contribute to acinar cell, but not islet beta cell,  
453 regeneration. *J Clin Invest*. 2007;117(4):971-7.
- 454 23. Grimont A, Pinho AV, Cowley MJ, Augereau C, Mawson A, Giry-Laterriere M,  
455 et al. SOX9 regulates ERBB signalling in pancreatic cancer development. *Gut*.  
456 2015;64(11):1790-9.
- 457 24. Goyama S, Yamamoto G, Shimabe M, Sato T, Ichikawa M, Ogawa S, et al. Evi-  
458 1 is a critical regulator for hematopoietic stem cells and transformed leukemic cells.  
459 *Cell Stem Cell*. 2008;3(2):207-20.
- 460 25. MacDonald RJ, Swift GH, Real FX. Transcriptional control of acinar  
461 development and homeostasis. *Prog Mol Biol Transl Sci*. 2010;97:1-40.
- 462 26. Baer R, Cintas C, Dufresne M, Cassant-Sourdy S, Schonhuber N, Planque L,  
463 et al. Pancreatic cell plasticity and cancer initiation induced by oncogenic Kras is  
464 completely dependent on wild-type PI 3-kinase p110alpha. *Genes Dev*.  
465 2014;28(23):2621-35.

- 466 27. Elghazi L, Weiss AJ, Barker DJ, Callaghan J, Staloch L, Sandgren EP, et al.  
467 Regulation of pancreas plasticity and malignant transformation by Akt signaling.  
468 *Gastroenterology*. 2009;136(3):1091-103.
- 469 28. Wu CY, Carpenter ES, Takeuchi KK, Halbrook CJ, Peverley LV, Bien H, et al.  
470 PI3K regulation of RAC1 is required for KRAS-induced pancreatic tumorigenesis in  
471 mice. *Gastroenterology*. 2014;147(6):1405-16 e7.
- 472 29. Shi ZD, Lee K, Yang D, Amin S, Verma N, Li QV, et al. Genome Editing in  
473 hPSCs Reveals GATA6 Haploinsufficiency and a Genetic Interaction with GATA4 in  
474 Human Pancreatic Development. *Cell Stem Cell*. 2017;20(5):675-88 e6.
- 475 30. Tiyaboonchai A, Cardenas-Diaz FL, Ying L, Maguire JA, Sim X, Jobaliya C, et  
476 al. GATA6 Plays an Important Role in the Induction of Human Definitive Endoderm,  
477 Development of the Pancreas, and Functionality of Pancreatic beta Cells. *Stem Cell*  
478 *Reports*. 2017;8(3):589-604.
- 479 31. Martinelli P, Carrillo-de Santa Pau E, Cox T, Sainz B, Jr., Dusetti N, Greenhalf  
480 W, et al. GATA6 regulates EMT and tumor dissemination, and is a marker of response  
481 to adjuvant chemotherapy in pancreatic cancer. *Gut*. 2017;66(9):1665-76.
- 482 32. Martinelli P, Madriles F, Canamero M, Pau EC, Pozo ND, Guerra C, et al. The  
483 acinar regulator Gata6 suppresses KrasG12V-driven pancreatic tumorigenesis in  
484 mice. *Gut*. 2016;65(3):476-86.
- 485 33. Longoni N, Kunderfranco P, Pellini S, Albino D, Mello-Grand M, Pinton S, et al.  
486 Aberrant expression of the neuronal-specific protein DCDC2 promotes malignant  
487 phenotypes and is associated with prostate cancer progression. *Oncogene*.  
488 2013;32(18):2315-24, 24 e1-4.

- 489 34. Izutsu K, Kurokawa M, Imai Y, Maki K, Mitani K, Hirai H. The corepressor CtBP  
490 interacts with Evi-1 to repress transforming growth factor beta signaling. *Blood*.  
491 2001;97(9):2815-22.
- 492 35. Yuasa H, Oike Y, Iwama A, Nishikata I, Sugiyama D, Perkins A, et al. Oncogenic  
493 transcription factor Evi1 regulates hematopoietic stem cell proliferation through GATA-  
494 2 expression. *EMBO J*. 2005;24(11):1976-87.
- 495 36. Buonamici S, Chakraborty S, Senyuk V, Nucifora G. The role of EVI1 in normal  
496 and leukemic cells. *Blood Cells Mol Dis*. 2003;31(2):206-12.
- 497 37. Ye J, Huang A, Wang H, Zhang AMY, Huang X, Lan Q, et al. PRDM3 attenuates  
498 pancreatitis and pancreatic tumorigenesis by regulating inflammatory response. *Cell*  
499 *Death & Disease*. 2020;11(3):187.
- 500 38. Schaffer AE, Freude KK, Nelson SB, Sander M. Nkx6 transcription factors and  
501 Ptf1a function as antagonistic lineage determinants in multipotent pancreatic  
502 progenitors. *Dev Cell*. 2010;18(6):1022-9.
- 503 39. Zhou Q, Law AC, Rajagopal J, Anderson WJ, Gray PA, Melton DA. A  
504 multipotent progenitor domain guides pancreatic organogenesis. *Dev Cell*.  
505 2007;13(1):103-14.
- 506 40. Garside VC, Cullum R, Alder O, Lu DY, Vander Werff R, Bilenky M, et al. SOX9  
507 modulates the expression of key transcription factors required for heart valve  
508 development. *Development*. 2015;142(24):4340-50.
- 509 41. Mateo F, Arenas EJ, Aguilar H, Serra-Musach J, de Garibay GR, Boni J, et al.  
510 Stem cell-like transcriptional reprogramming mediates metastatic resistance to mTOR  
511 inhibition. *Oncogene*. 2017;36(19):2737-49.

- 512 42. Jensen JN, Cameron E, Garay MV, Starkey TW, Gianani R, Jensen J.  
513 Recapitulation of elements of embryonic development in adult mouse pancreatic  
514 regeneration. *Gastroenterology*. 2005;128(3):728-41.
- 515 43. Bard-Chapeau EA, Jeyakani J, Kok CH, Muller J, Chua BQ, Gunaratne J, et al.  
516 Ecotopic viral integration site 1 (EVI1) regulates multiple cellular processes important  
517 for cancer and is a synergistic partner for FOS protein in invasive tumors. *Proc Natl*  
518 *Acad Sci U S A*. 2012;109(6):2168-73.
- 519 44. Collins MA, Yan W, Sebolt-Leopold JS, Pasca di Magliano M. MAPK signaling  
520 is required for dedifferentiation of acinar cells and development of pancreatic  
521 intraepithelial neoplasia in mice. *Gastroenterology*. 2014;146(3):822-34 e7.
- 522 45. Means AL, Meszoely IM, Suzuki K, Miyamoto Y, Rustgi AK, Coffey RJ, Jr., et  
523 al. Pancreatic epithelial plasticity mediated by acinar cell transdifferentiation and  
524 generation of nestin-positive intermediates. *Development*. 2005;132(16):3767-76.
- 525 46. Stanger BZ, Stiles B, Lauwers GY, Bardeesy N, Mendoza M, Wang Y, et al.  
526 Pten constrains centroacinar cell expansion and malignant transformation in the  
527 pancreas. *Cancer Cell*. 2005;8(3):185-95.
- 528 47. Strobel O, Dor Y, Alsina J, Stirman A, Lauwers G, Trainor A, et al. In vivo lineage  
529 tracing defines the role of acinar-to-ductal transdifferentiation in inflammatory ductal  
530 metaplasia. *Gastroenterology*. 2007;133(6):1999-2009.
- 531 48. Tanaka M, Shibahara J, Ishikawa S, Ushiku T, Morikawa T, Shinozaki-Ushiku  
532 A, et al. EVI1 expression is associated with aggressive behavior in intrahepatic  
533 cholangiocarcinoma. *Virchows Arch*. 2019;474(1):39-46.
- 534 49. Ardito CM, Grüner BM, Takeuchi KK, Lubeseder-Martellato C, Teichmann N,  
535 Mazur PK, et al. EGF receptor is required for KRAS-induced pancreatic tumorigenesis.  
536 *Cancer Cell*. 2012;22(3):304-17.

537 50. Hamada S, Masamune A. Elucidating the link between collagen and pancreatic  
538 cancer: what's next? *Expert Rev Gastroenterol Hepatol.* 2018;12(4):315-7.

539

## 540 **Figure Legends**

541

542 **Figure 1. RNAseq analysis identifies *MECOM* as uniquely expressed in**  
543 **dedifferentiated acinar cells.** (a) Schematic overview of FACS-purification of human  
544 dedifferentiated acinar and duct cells, using acinar-specific UEA-1 lectin. (b)  
545 Immunofluorescent staining of FACS-purified dedifferentiated acinar (UEA-1+/CA19.9-  
546 ) and duct (UEA-1-/CA19.9+) cells at day 4 with CD142 and CA19.9. DNA is labelled  
547 in blue. (c) Table of genes uniquely expressed in human dedifferentiated acinar cells  
548 (green) and duct cells. Selection limited to genes with BaseMean  $\geq 1000$ , Log2FC  $\geq 2$   
549 or  $\leq -2$  and P.adj  $\leq 0,01$ . (d) KEGG pathways enriched (Adj. p-value  $< 0,01$ ) in human  
550 dedifferentiated acinar cells (N=5).

551

552 **Figure 2. *MECOM* is uniquely upregulated in dedifferentiated acinar cells and not**  
553 **in duct cells.** (a) qPCR for *MECOM* on purified human dedifferentiated acinar (UEA-  
554 1+/CA19.9-) versus duct cells (UEA-1-/CA19.9+) after FACS isolation at day 4 of  
555 culture, compared to the mixed exocrine fraction at day of isolation (D0) (N=5; mean  $\pm$   
556 SD; \*\*\*p<0,005; One-way ANOVA with post-hoc Bonferroni correction). (b,c) RNA-ISH  
557 for *MECOM* on tissue from normal human pancreas (b) and human chronic pancreatitis  
558 (c) Scale = 50 $\mu$ M. Arrows indicate individual mRNA dots. (d,e) Immunofluorescent co-  
559 staining of human mixed exocrine fraction at day 4 of culture for *MECOM* and CD142  
560 (d) and for *MECOM* and CK19 (e). Scale = 50 $\mu$ M. (f-i) RNA-ISH for *Mecom* and (j)  
561 *Mecom* expression level in normal mouse pancreas (f; dotted line indicates a normal  
562 duct, striped line indicates the outer edge of an islet), embryonic pancreas (g); E16.5

563 embryonic pancreas; dashed line indicates groups of tip cells) and in a mouse model  
564 for acute (h) and chronic (i) pancreatitis. Scale = 50 $\mu$ M. (j) 5 individual microscopic  
565 fields per replicate were quantified. (N=5; mean  $\pm$  SD; \*p<0,05; \*\*p<0,01; One-way  
566 ANOVA with post-hoc Bonferroni correction;).

567

568 **Figure 3. SOX9 regulates MECOM during acinar cell dedifferentiation.** (a) qPCR  
569 for MECOM and SOX9 expression on human exocrine mixed fraction in culture over  
570 time (day 1 to day 8). Each donor is indicated as a different colored line. (b) Immunoblot  
571 for MECOM, SOX9 and actin as loading control on human exocrine mixed fraction in  
572 culture over time. Representative blot from N=3 human donor samples. The different  
573 isoforms of MECOM locus are indicated by arrows. (c) Generation of acinar-specific  
574 (Elastase) Cre deleter mice with Sox9<sup>ex5</sup> flanked by loxP sites. Acinar-specific deletion  
575 of SOX9 is performed in ElaCreERT;Sox9<sup>ff</sup> versus control (ElaCreERT) littermates by  
576 administering tamoxifen 3 times over a period of 5 days, followed by a two-week  
577 washout. Acute pancreatitis is induced by administering caerulein by 7 hourly injections  
578 for 3 days over a period of 5 days. Mice are sacrificed at day 4 after caerulein  
579 administration. Immunohistochemical staining for SOX9 and RNA in situ hybridization  
580 of *Mecom* mRNA expression in mouse pancreatic tissue after experimentally induced  
581 acute pancreatitis in control (ElaCreERT) and acinar-specific Sox9 knockout  
582 (ElaCreERT;Sox9<sup>ff</sup>) mice. Scale = 50 $\mu$ M. (N=3; \*\*p<0.01; unpaired two-tailed t-test)  
583 (d) Luciferase reporter assay in 266-6 cells, 48h after transfection. (mean  $\pm$  SD; N=3;  
584 \*\*\*p<0,001; one-way ANOVA with post-hoc Bonferroni correction)

585

586 **Figure 4. Mecom retains cell adhesion and survival in 266-6 cells.** (a) RNA in situ  
587 hybridization (RISH) on control (NT-gRNA) and Mecom KO (gRNA3) 266-6 cells. Scale



588 = 200 $\mu$ M. (N=3; \*\*p<0,01; unpaired two-tailed t-test). (b) Phase contrast images of  
589 control (NT-gRNA) and Mecom KO (gRNA3) 266-6 cells. Scale = 200 $\mu$ M. (c) Absolute  
590 number of cells at 96h after seeding 50.000 cells (mean  $\pm$  SD; N=3; \*\*p<0,01; unpaired  
591 two-tailed t-test) (d) Cell viability measured relative to background levels of the culture  
592 medium by CellTiter Glo assay (mean  $\pm$  SD; N=3; \*\*\*p<0,001; unpaired two-tailed t-  
593 test) (e) Immunofluorescent staining and quantification of cleaved caspase 3+ cells.  
594 (N=3; \*\*p<0,01; unpaired two-tailed t-test) (f) KEGG pathway analysis on differential  
595 gene expression profiles after RNAseq analysis of MECOM wildtype versus MECOM  
596 KO cells (N=3) (g) Venn diagrams showing genes overlapping between differentially  
597 expressed genes in MECOM KO 266-6 cells and publicly available ChIP-seq dataset  
598 from Bard-Chapeau et al. (43) (h) Schematic representation of our hypothesis. (i)  
599 Collagen IV immunofluorescent staining on 266-6 NTgRNA and gRNA3-transduced  
600 cultured cells. (j) Immunoblot for phospho-ERK and total ERK and quantifications of  
601 pERK relative to total protein stain. (mean  $\pm$  SD; N=3; \*p<0,05; Unpaired two-tailed t-  
602 test)

603

604 **Figure 5. *Mecom* retains cell adhesion and survival in cultured acinar cells.** (a)  
605 Acinar cell-specific deletion of MECOM is performed by administering tamoxifen 3  
606 times over a period of 5 days both subcutaneously and by gavage, followed by a two-  
607 week washout period. Acute pancreatitis is induced by administering caerulein by 7  
608 hourly injections for 3 days over a period of 5 days. Mice are sacrificed at day 4 after  
609 caerulein treatment. (b,e) Phase contrast images and quantification of mean cluster  
610 surface of ElaCreERT and ElaCreERT;*Mecom*<sup>ff</sup> isolated acinar cells immediately after  
611 isolation (D0) and at day 4 of culture (D4). Scale = 100 $\mu$ M. (c,f) Cleaved caspase 3  
612 staining and quantification on ElaCreERT and ElaCreERT;*Mecom*<sup>ff</sup> acinar cells at day

613 4 of culture. Scale = 25 $\mu$ M. (d,g) CK19 staining and quantification of ElaCreERT and  
614 ElaCreERT;*Mecom*<sup>fl/fl</sup> acinar cells at day 4 of culture. Scale = 25 $\mu$ M. (mean  $\pm$  SD; N=6;  
615 \*p<0,05; \*\*p<0,01; two-way ANOVA with post-hoc Bonferroni correction.)

616

617 **Figure 6. *Mecom* depletion in acinar cells *in vivo* causes pronounced cell death**  
618 **during recovery after caerulein-induced acute pancreatitis.** (a) Acinar-specific  
619 deletion of MECOM is performed by administering tamoxifen 3 times over a period of  
620 5 days, followed by a two-week washout period. Acute pancreatitis is induced by  
621 administering caerulein by 7 hourly injections for 3 days over a period of 5 days. Mice  
622 are sacrificed at day 4 and day 11 after caerulein administration. (b,f) H&E staining  
623 and quantification of acinar/non-acinar area ratio relative to day 4. (c,g) Cleaved  
624 caspase 3 immunohistochemical staining and quantification at day 4. (d,h) Collagen  
625 staining and quantification relative to day 4. Scale = 50 $\mu$ M. (e,i) CD3 staining and  
626 quantification relative to day 4 for ElaCreERT and ElaCreERT;*Mecom*<sup>fl/fl</sup> mice. Scale =  
627 50 $\mu$ M. (mean  $\pm$  SD, N=6, \*\*p<0,01, ns = non-significant. two-way ANOVA with post-  
628 hoc Bonferroni correction)

629

Figure 1

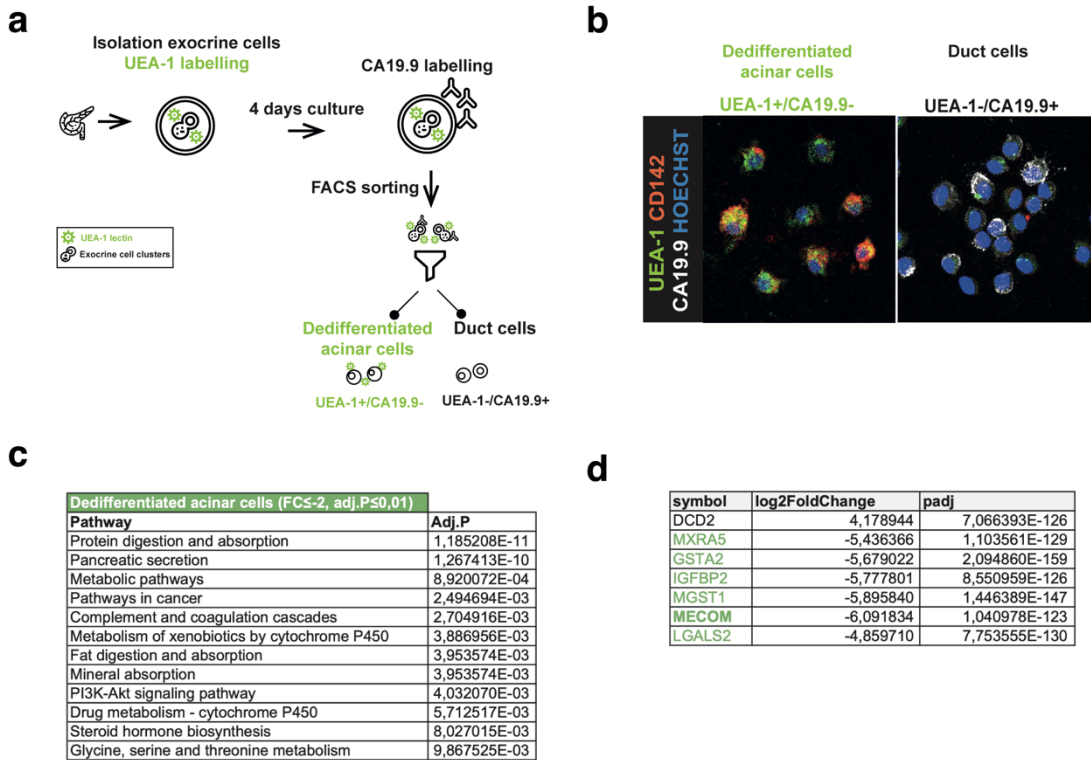

Figure 2

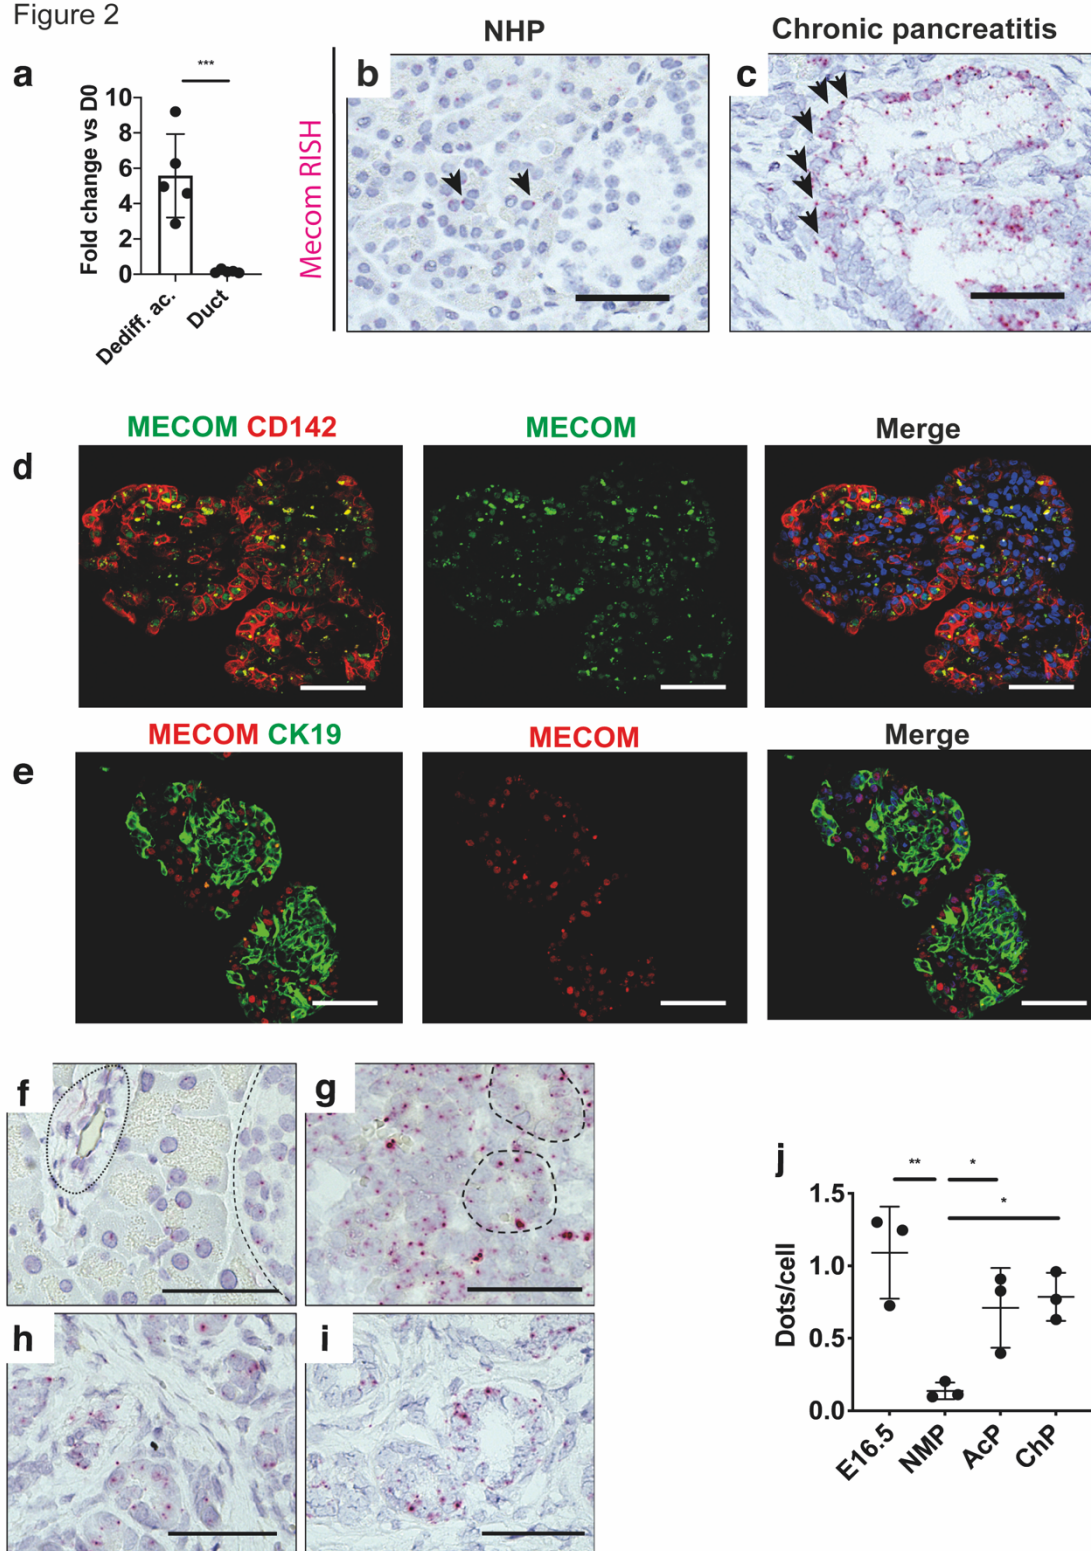

Figure 3

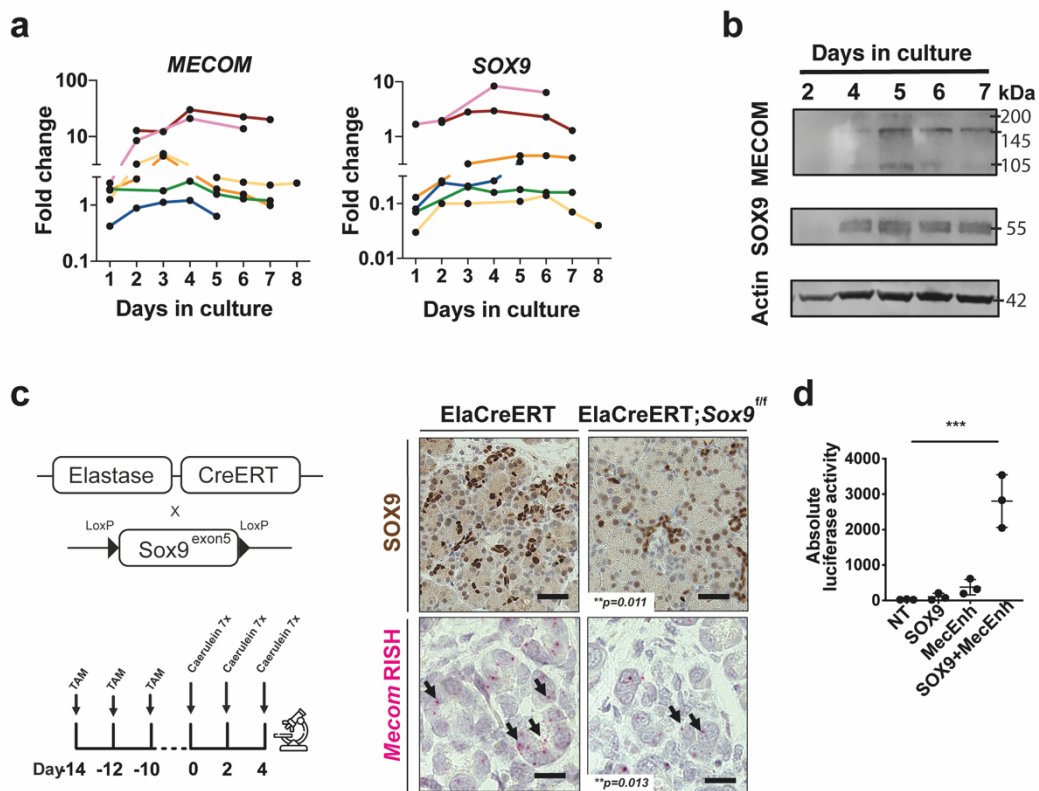

Figure 4

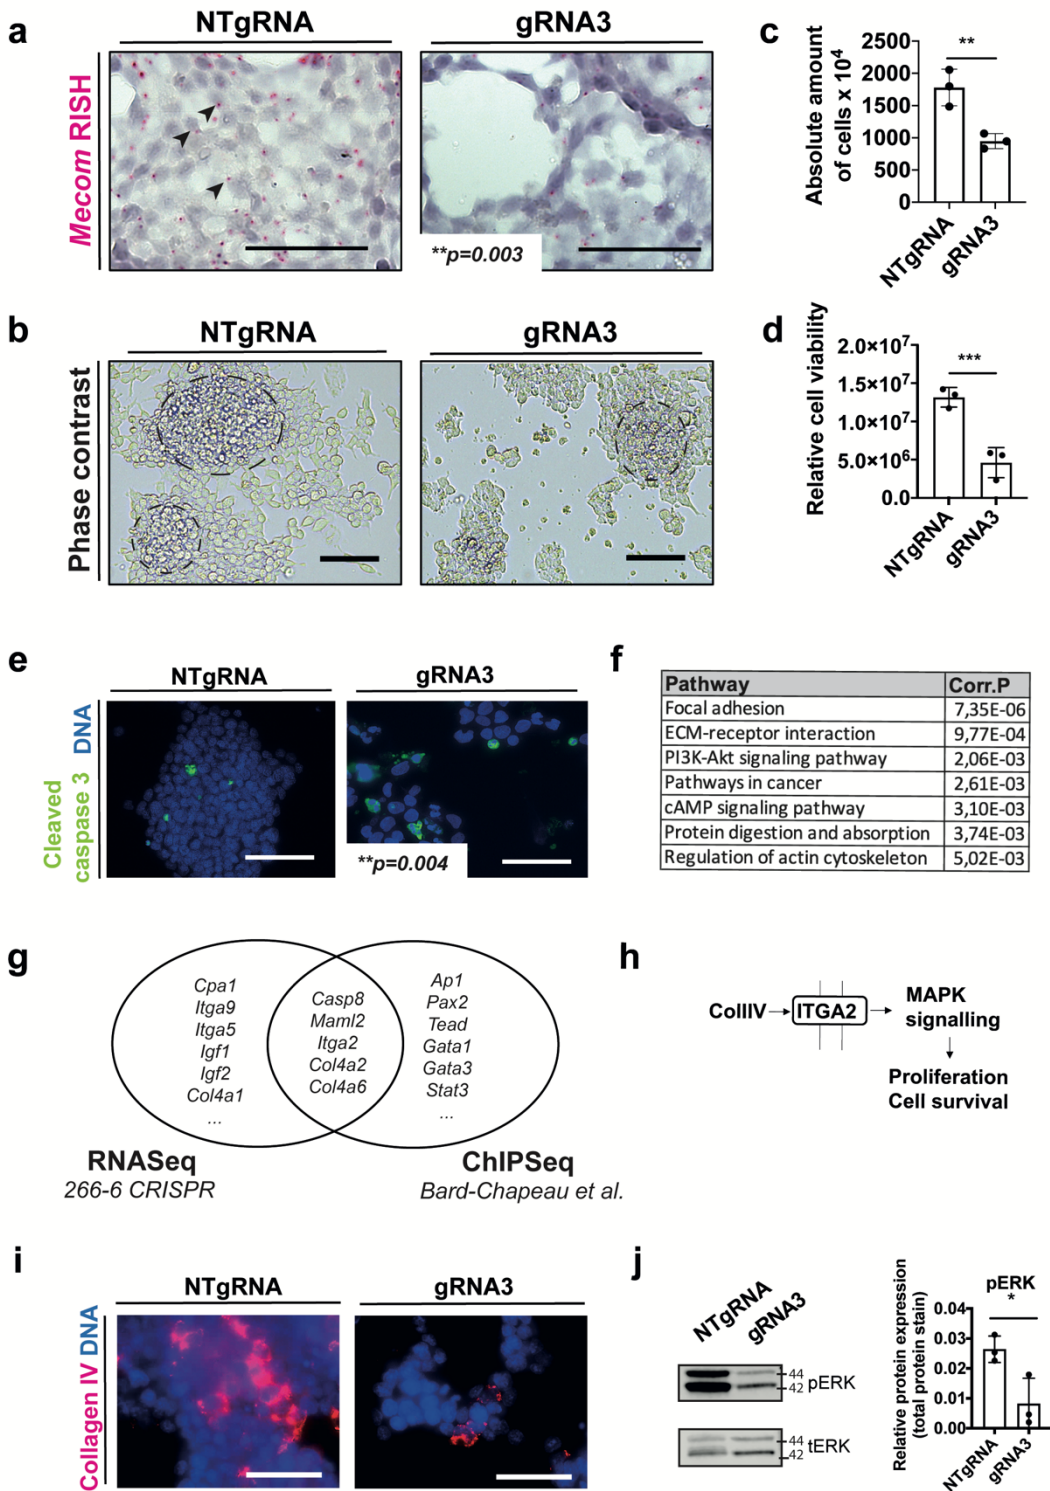

Figure 5

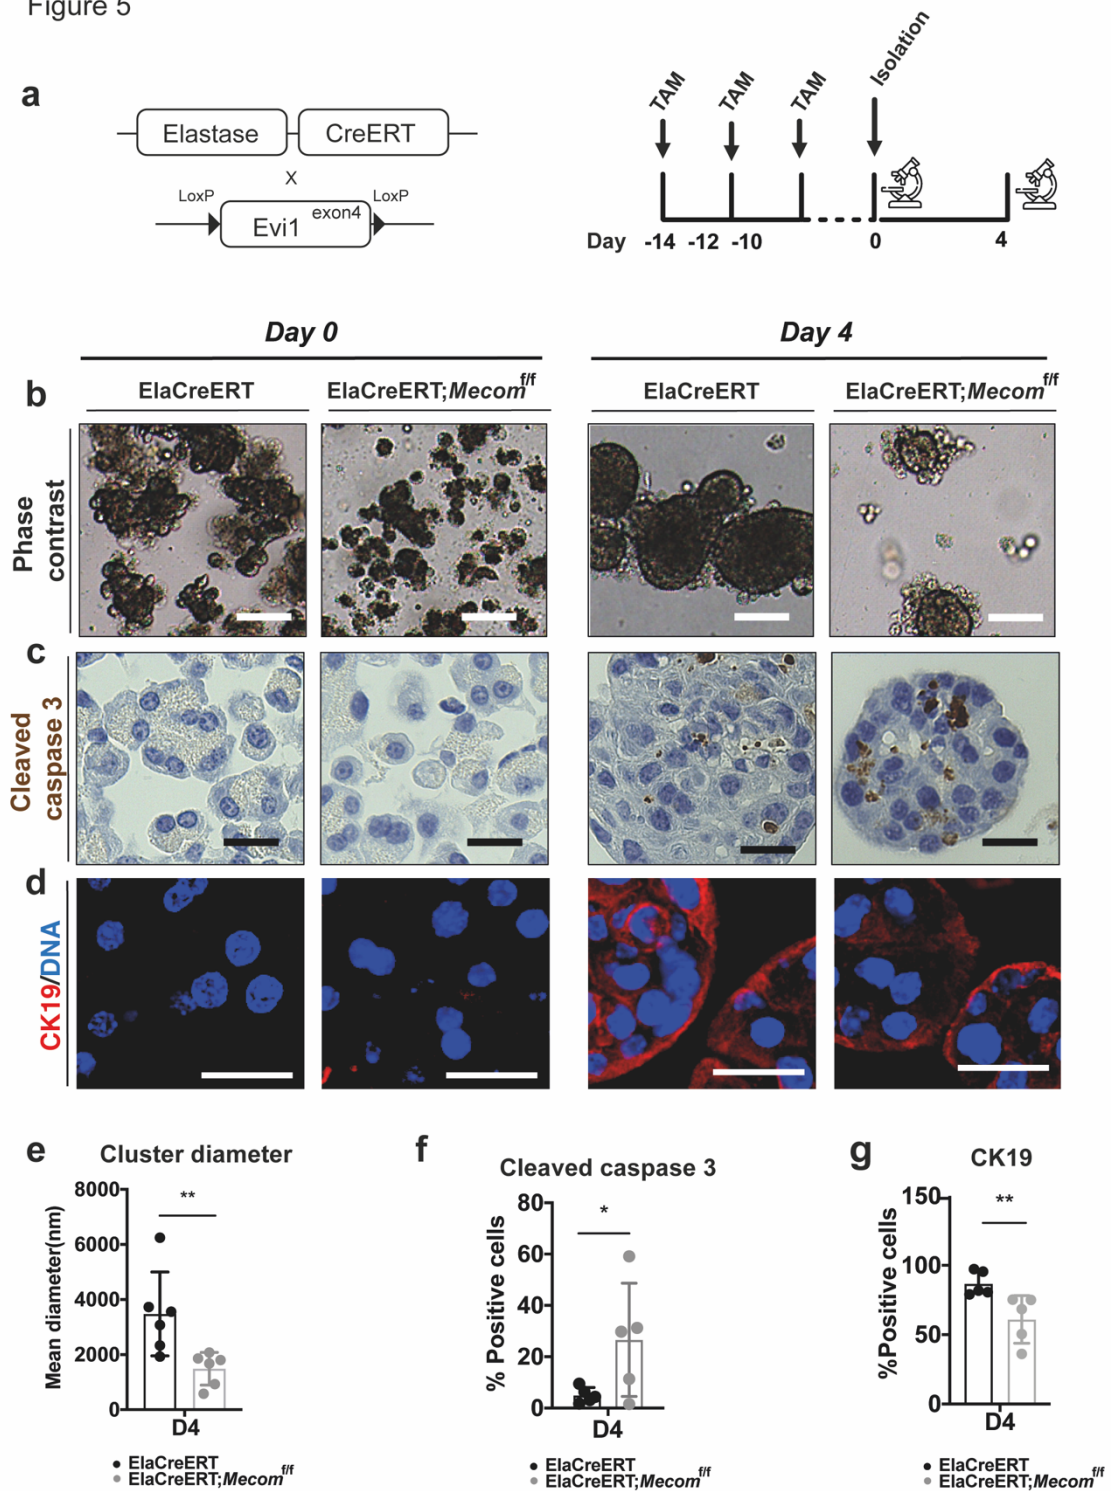

Figure 6

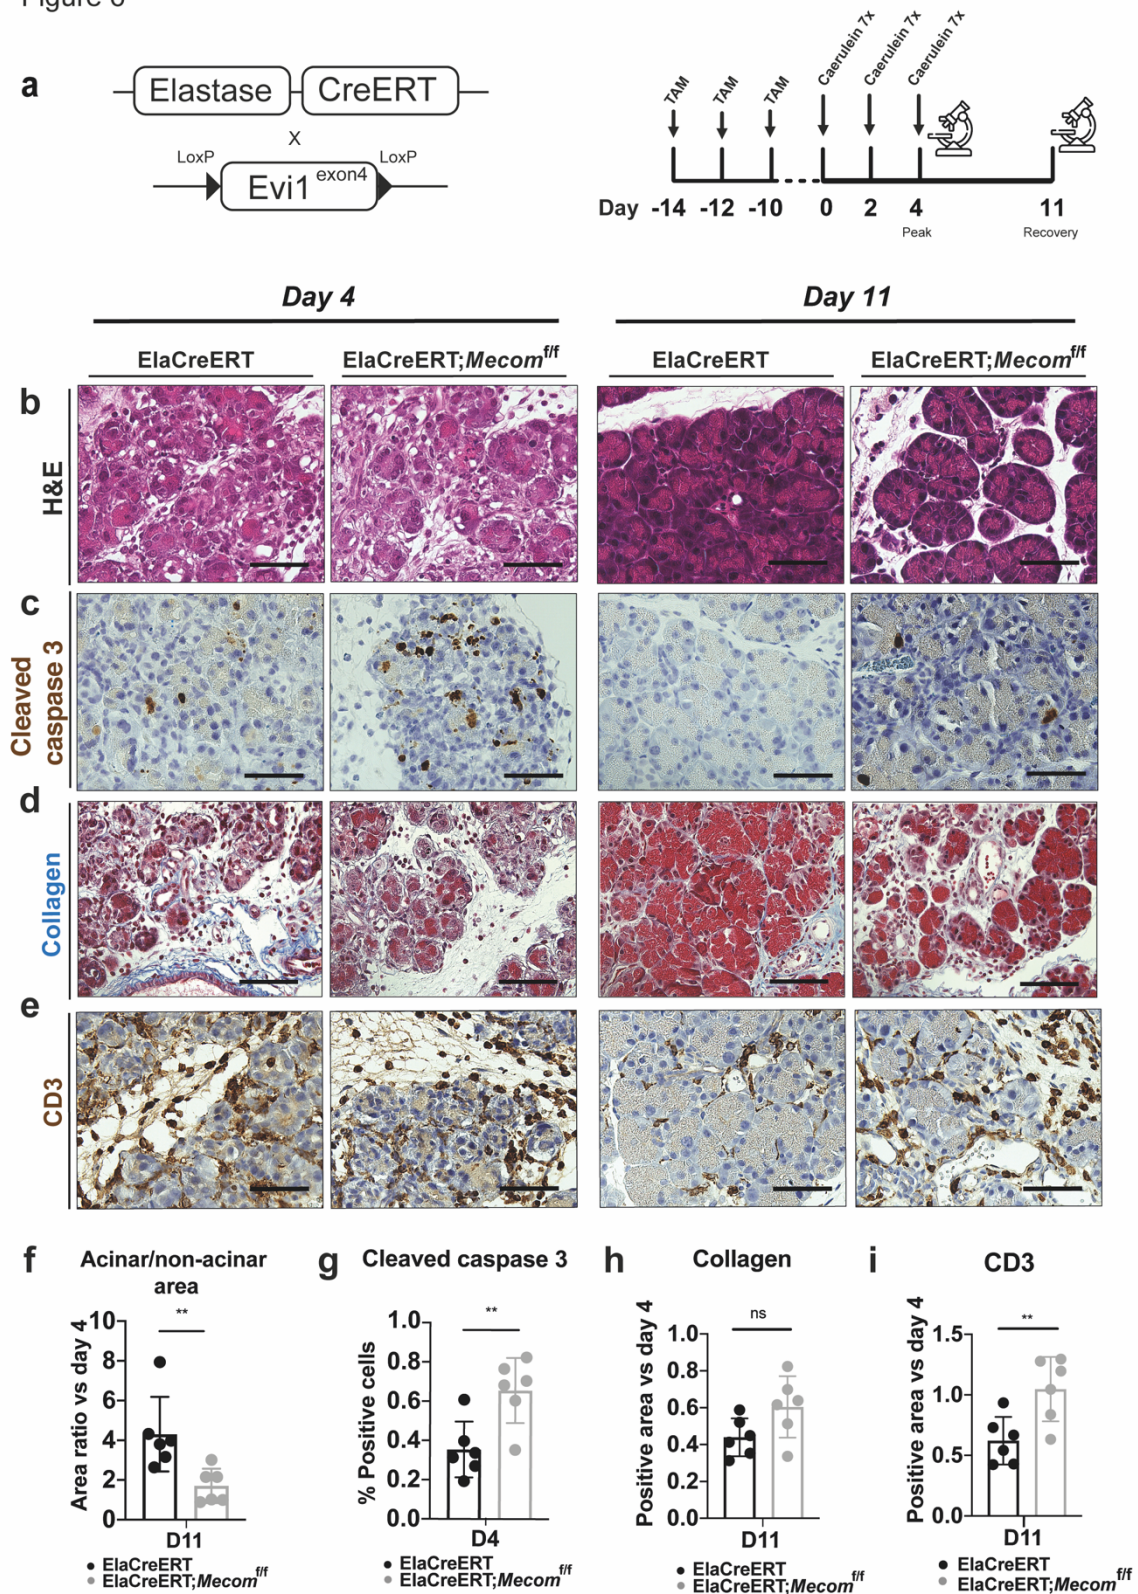

Source: https://www.biorxiv.org/content/biorxiv/early/2020/08/23/2020.08.21.260539.full.pdf
